# Supplementary material
Source: Springer Nature journal article supplement (https://www.springermedizin.de/resource/supplementary/12885_2007_1185_MOESM2_ESM.pdf/9471346)

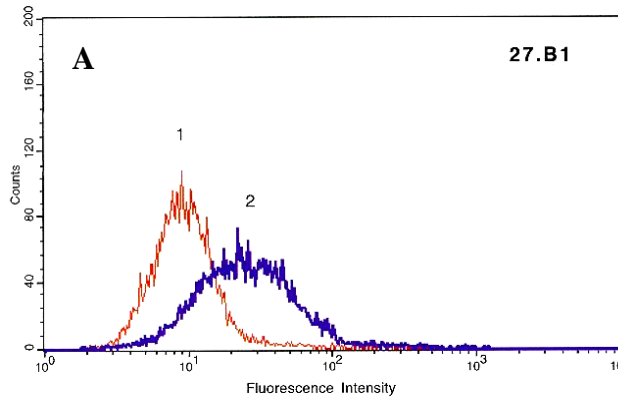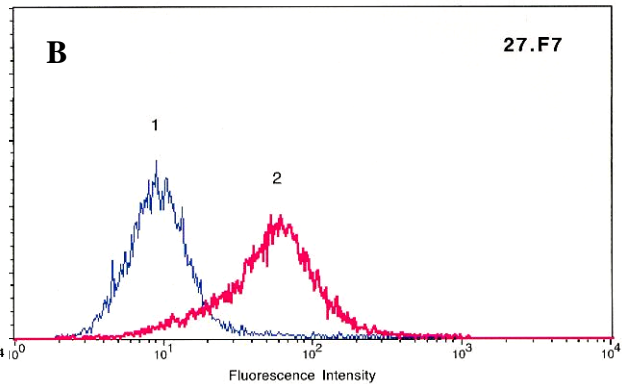

Supplement: MOESM2 [file 9471346]
